# Supplementary material
Source: PubMed Central journal article supplement (PMC7355336)
Supplement: NIHMS1605177-supplement-Supplementary_Material.pdf [file NIHMS1605177-supplement-Supplementary_Material.pdf]

Supplemental Table 1 - Sample size by employment groups, gender, and race

|                                             | Black | White | Female | Male | Total |
|---------------------------------------------|-------|-------|--------|------|-------|
| <b>Employment Status</b>                    |       |       |        |      |       |
| Full-time                                   | 383   | 675   | 522    | 536  | 1,058 |
| Part-time                                   | 78    | 163   | 149    | 92   | 241   |
| Unemployed/looking                          | 106   | 99    | 100    | 105  | 205   |
| Keeping house                               | 92    | 84    | 112    | 64   | 176   |
| Raising children                            | 172   | 216   | 288    | 100  | 388   |
| Total                                       | 831   | 1,237 | 1,171  | 897  | 2,068 |
| <b>Occupational Categories</b>              |       |       |        |      |       |
| Building/Grounds/Maintenance                | 7     | 8     | 7      | 8    | 15    |
| Food Preparation and Serving                | 9     | 9     | 11     | 7    | 18    |
| Construction and Extraction <sup>3</sup>    | 11    | 19    | 4      | 26   | 30    |
| Personal Care and Service                   | 15    | 21    | 24     | 12   | 36    |
| Production                                  | 24    | 30    | 13     | 41   | 54    |
| Education, Training, and Library            | 28    | 63    | 66     | 25   | 91    |
| Transportation/Material Moving              | 35    | 29    | 20     | 44   | 64    |
| Installation/Maintenance/Repair             | 15    | 19    | 7      | 27   | 34    |
| Sales                                       | 28    | 58    | 35     | 51   | 86    |
| Life, Physical, Social Sciences             | 5     | 32    | 19     | 18   | 37    |
| Arts/Entertainment/Sports                   | 8     | 33    | 19     | 22   | 41    |
| Healthcare Practitioners                    | 23    | 100   | 84     | 39   | 123   |
| Legal <sup>2</sup>                          | 4     | 33    | 11     | 26   | 37    |
| Protective Service                          | 21    | 11    | 12     | 20   | 32    |
| Business/Financial                          | 23    | 58    | 49     | 32   | 81    |
| Management                                  | 49    | 132   | 78     | 103  | 181   |
| Healthcare Support <sup>2,3</sup>           | 8     | 4     | 11     | 1    | 12    |
| Community and Social Service                | 20    | 21    | 32     | 9    | 41    |
| Computer/Mathematical                       | 19    | 49    | 29     | 39   | 68    |
| Architecture/Engineering                    | 8     | 23    | 5      | 26   | 31    |
| Office and Administrative Support           | 98    | 84    | 134    | 48   | 182   |
| Military <sup>1</sup>                       | 2     | 0     | 0      | 2    | 2     |
| Farming, Fishing, and Forestry <sup>1</sup> | 0     | 2     | 0      | 2    | 2     |
| Total included in analysis                  | 446   | 799   | 655    | 597  |       |

<sup>1</sup> = excluded from all occupational category analyses; <sup>2</sup> = excluded from the occupational category analysis stratified by race; <sup>3</sup> = excluded from the occupational category analysis stratified by sex
